# Supplementary material for: Teacher-Reported Prevalence of FASD in Kindergarten in Canada: Association with Child Development and Problems at Home
Source: Springer Nature journal article supplement (doi:10.1007/s10803-020-04545-w), 2020-05-29
Supplement: MOESM1 [file 18034498]

## Appendix

### Appendix 1. EDI domain scores for all children in Canada

| Domain                                     | Mean | Standard Deviation |
|--------------------------------------------|------|--------------------|
| Physical Health & Well-Being               | 8.71 | 1.43               |
| Social Competence                          | 8.21 | 1.92               |
| Emotional Maturity                         | 7.92 | 1.59               |
| Language and Cognitive Development         | 8.42 | 1.87               |
| Communication Skills and General Knowledge | 7.61 | 2.65               |

*Note.* EDI domain scores range from 0 to 10

Appendix 2. EDI subdomain scores for all children in Canada

| Subdomains                                        | Mean | Standard Deviation |
|---------------------------------------------------|------|--------------------|
| Physical Health & Well-Being subdomains           |      |                    |
| Physical Readiness for School Delay subdomain     | 8.79 | 2.11               |
| Physical Independence subdomain                   | 9.64 | 1.12               |
| Gross and Fine Motor Skills subdomain             | 7.90 | 2.41               |
| Social Competence subdomains                      |      |                    |
| Overall social competence subdomain               | 7.66 | 2.45               |
| Responsibility and Respect subdomain              | 8.47 | 2.11               |
| Approaches to Learning subdomain                  | 8.00 | 2.26               |
| Readiness to Explore New Things subdomain         | 8.87 | 1.95               |
| Emotional Maturity subdomains                     |      |                    |
| Prosocial and Helping Behaviour subdomain         | 5.57 | 3.07               |
| Anxious and Fearful Behaviour subdomain           | 8.86 | 1.55               |
| Aggressive Behaviour subdomain                    | 9.17 | 1.58               |
| Hyperactivity and Inattentive Behaviour subdomain | 8.18 | 2.51               |
| Language and Cognitive Development subdomains     |      |                    |
| Basic Literacy subdomain                          | 9.12 | 1.75               |
| Interest Literacy/Numeracy and Memory subdomain   | 8.92 | 2.24               |
| Advanced Literacy subdomain                       | 6.16 | 3.27               |
| Basic Numeracy subdomain                          | 9.21 | 1.87               |

*Note.* The communication skills and general knowledge subdomain is the same as the domain and therefore is not included in this table. EDI subdomain scores range from 0 to 10

Appendix 3. MANCOVA univariate results examining differences in scores on all 16 subdomains in Canada among children with FASD-only, children with FASD and other comorbidities, and children with other NDDs

|                                          |           | Mean | Standard Error | F                      | <i>p</i> |
|------------------------------------------|-----------|------|----------------|------------------------|----------|
| Physical readiness for the school day    | FASD only | 7.56 | 0.12           | F (2, 37.28) = 5.44    | .004     |
|                                          | FASD+     | 7.46 | 0.24           |                        |          |
|                                          | NDDs      | 7.90 | 0.03           |                        |          |
| Physical independence                    | FASD only | 8.46 | 0.12           | F (2, 408.12) = 54.11  | < .001   |
|                                          | FASD+     | 7.75 | 0.25           |                        |          |
|                                          | NDDs      | 7.15 | 0.03           |                        |          |
| Gross and fine motor skills              | FASD only | 5.62 | 0.13           | F (2, 262.30) = 32.84  | < .001   |
|                                          | FASD+     | 5.30 | 0.26           |                        |          |
|                                          | NDDs      | 4.59 | 0.03           |                        |          |
| Overall social competence                | FASD only | 4.37 | 0.12           | F (2, 182.43) = 27.60  | < .001   |
|                                          | FASD+     | 3.59 | 0.23           |                        |          |
|                                          | NDDs      | 3.48 | 0.03           |                        |          |
| Responsibility and respect               | FASD only | 5.65 | 0.13           | F (2, 47.718) = 6.01   | .002     |
|                                          | FASD+     | 4.93 | 0.26           |                        |          |
|                                          | NDDs      | 5.22 | 0.03           |                        |          |
| Approaches to learning                   | FASD only | 4.73 | 0.11           | F (2, 149.38) = 23.77  | < .001   |
|                                          | FASD+     | 4.29 | 0.23           |                        |          |
|                                          | NDDs      | 3.93 | 0.03           |                        |          |
| Readiness to explore new things          | FASD only | 7.83 | 0.14           | F (2, 525.31) = 58.90  | < .001   |
|                                          | FASD+     | 7.13 | 0.27           |                        |          |
|                                          | NDDs      | 6.35 | 0.03           |                        |          |
| Prosocial and helping behaviour          | FASD only | 3.44 | 0.11           | F (2, 613.58) = 108.32 | < .001   |
|                                          | FASD+     | 3.01 | 0.22           |                        |          |
|                                          | NDDs      | 1.88 | 0.03           |                        |          |
| Anxious and fearful behaviour            | FASD only | 7.85 | 0.11           | F (2, 10.59) = 2.83    | .059     |
|                                          | FASD+     | 7.39 | 0.22           |                        |          |
|                                          | NDDs      | 7.71 | 0.03           |                        |          |
| Aggressive behaviour                     | FASD only | 7.13 | 0.09           | F (2, 155.74) = 33.98  | < .001   |
|                                          | FASD+     | 7.08 | 0.18           |                        |          |
|                                          | NDDs      | 7.86 | 0.02           |                        |          |
| Hyperactivity and inattentive behaviour  | FASD only | 4.19 | 0.10           | F (2, 35.29) = 3.75    | .024     |
|                                          | FASD+     | 4.00 | 0.19           |                        |          |
|                                          | NDDs      | 4.50 | 0.03           |                        |          |
| Basic literacy                           | FASD only | 7.09 | 0.14           | F (2, 146.21) = 13.85  | <.001    |
|                                          | FASD+     | 6.73 | 0.28           |                        |          |
|                                          | NDDs      | 6.31 | 0.04           |                        |          |
| Interest in literacy/numeracy and memory | FASD only | 7.14 | 0.15           | F (2, 171.36) = 14.22  | < .001   |
|                                          | FASD+     | 6.69 | 0.29           |                        |          |
|                                          | NDDs      | 6.29 | 0.04           |                        |          |
| Advanced literacy                        | FASD only | 3.29 | 0.16           | F (2, 1.41) = 0.12     | .890     |
|                                          | FASD+     | 3.38 | 0.31           |                        |          |
|                                          | NDDs      | 3.37 | 0.04           |                        |          |
| Basic numeracy                           | FASD only | 6.96 | 0.16           | F (2, 104.90) = 8.05   | < .001   |
|                                          | FASD+     | 6.89 | 0.32           |                        |          |

|                                               |           |      |      |                       |        |
|-----------------------------------------------|-----------|------|------|-----------------------|--------|
|                                               | NDDs      | 6.34 | 0.04 |                       |        |
| Communication skills and<br>general knowledge | FASD only | 4.75 | 0.13 | F (2, 585.07) = 69.98 | < .001 |
|                                               | FASD+     | 4.17 | 0.26 |                       |        |
|                                               | NDDs      | 3.21 | 0.03 |                       |        |

---

*Note.* MANCOVA controlled for age, sex, EFSL status, home problems, and neighbourhood SES.

Appendix 4. MANCOVA univariate results examining differences in scores on all 16 subdomains in Ontario among children with FASD-only, children with FASD and other comorbidities, and children with other NDDs

|                                          |           | Mean | Standard Error | F                     | <i>p</i> |
|------------------------------------------|-----------|------|----------------|-----------------------|----------|
| Physical readiness for the school day    | FASD only | 7.26 | .28            | F (2, 7.16) = 2.48    | .625     |
|                                          | FASD+     | 7.73 | .52            |                       |          |
|                                          | NDDs      | 7.88 | .04            |                       |          |
| Physical independence                    | FASD only | 8.56 | .29            | F (2, 77.82) = 10.41  | < .001   |
|                                          | FASD+     | 7.71 | .54            |                       |          |
|                                          | NDDs      | 7.25 | .04            |                       |          |
| Gross and fine motor skills              | FASD only | 5.99 | .29            | F (2, 109.68) = 14.20 | < .001   |
|                                          | FASD+     | 6.28 | .55            |                       |          |
|                                          | NDDs      | 4.67 | .05            |                       |          |
| Overall social competence                | FASD only | 4.22 | .26            | F (2, 36.73) = 5.88   | .003     |
|                                          | FASD+     | 3.66 | .49            |                       |          |
|                                          | NDDs      | 3.32 | .04            |                       |          |
| Responsibility and respect               | FASD only | 5.24 | .30            | F (2, 4.04) = 0.51    | .598     |
|                                          | FASD+     | 4.63 | .55            |                       |          |
|                                          | NDDs      | 5.04 | .05            |                       |          |
| Approaches to learning                   | FASD only | 4.59 | .26            | F (2, 23.69) = 3.96   | .019     |
|                                          | FASD+     | 4.43 | .48            |                       |          |
|                                          | NDDs      | 3.90 | .04            |                       |          |
| Readiness to explore new things          | FASD only | 7.73 | .32            | F (2, 111.69) = 12.13 | < .001   |
|                                          | FASD+     | 6.65 | .60            |                       |          |
|                                          | NDDs      | 6.14 | .05            |                       |          |
| Prosocial and helping behaviour          | FASD only | 3.54 | .25            | F (2, 159.98) = 29.50 | < .001   |
|                                          | FASD+     | 3.69 | .46            |                       |          |
|                                          | NDDs      | 1.88 | .04            |                       |          |
| Anxious and fearful behaviour            | FASD only | 7.71 | .21            | F (2, 2.65) = 0.68    | .505     |
|                                          | FASD+     | 7.23 | .39            |                       |          |
|                                          | NDDs      | 7.68 | .03            |                       |          |
| Aggressive behaviour                     | FASD only | 6.38 | .24            | F (2, 92.07) = 18.33  | < .001   |
|                                          | FASD+     | 6.40 | .44            |                       |          |
|                                          | NDDs      | 7.67 | .04            |                       |          |
| Hyperactivity and inattentive behaviour  | FASD only | 3.88 | .32            | F (2, 19.34) = 2.07   | .127     |
|                                          | FASD+     | 3.70 | .60            |                       |          |
|                                          | NDDs      | 4.42 | .05            |                       |          |
| Basic literacy                           | FASD only | 7.61 | .34            | F (2, 75.29) = 7.25   | .001     |
|                                          | FASD+     | 7.60 | .63            |                       |          |
|                                          | NDDs      | 6.45 | .05            |                       |          |
| Interest in literacy/numeracy and memory | FASD only | 7.30 | .38            | F (2, 52.11) = 4.14   | .016     |
|                                          | FASD+     | 6.35 | .70            |                       |          |
|                                          | NDDs      | 6.21 | .06            |                       |          |
| Advanced literacy                        | FASD only | 4.17 | .38            | F (2, 22.75) = 1.79   | .167     |
|                                          | FASD+     | 4.31 | .70            |                       |          |
|                                          | NDDs      | 3.56 | .06            |                       |          |
| Basic numeracy                           | FASD only | 7.64 | .38            | F (2, 58.84) = 4.68   | .009     |
|                                          | FASD+     | 7.74 | .70            |                       |          |

|                                               |           |      |     |                       |        |
|-----------------------------------------------|-----------|------|-----|-----------------------|--------|
|                                               | NDDs      | 6.39 | .06 |                       |        |
| Communication skills and<br>general knowledge | FASD only | 5.09 | .30 | F (2, 222.54) = 28.08 | < .001 |
|                                               | FASD+     | 5.15 | .55 |                       |        |
|                                               | NDDs      | 3.11 | .05 |                       |        |

---

*Note.* MANCOVA controlled for age, sex, EFSL status, home problems, and neighbourhood SES.

Appendix 5. MANCOVA univariate results examining differences in scores on all 16 subdomains in Manitoba among children with FASD-only, children with FASD and other comorbidities, and children with other NDDs

|                                          |           | Mean | Standard Error | F                     | <i>p</i> |
|------------------------------------------|-----------|------|----------------|-----------------------|----------|
| Physical readiness for the school day    | FASD only | 8.00 | .30            | F (2, 5.51) = .853    | .427     |
|                                          | FASD+     | 7.45 | .42            |                       |          |
|                                          | NDDs      | 8.02 | .11            |                       |          |
| Physical independence                    | FASD only | 8.47 | .32            | F (2, 149.66) = 19.54 | < .001   |
|                                          | FASD+     | 7.57 | .46            |                       |          |
|                                          | NDDs      | 6.40 | .12            |                       |          |
| Gross and fine motor skills              | FASD only | 5.77 | .32            | F (2, 101.96) = 13.18 | < .001   |
|                                          | FASD+     | 4.93 | .46            |                       |          |
|                                          | NDDs      | 4.05 | .12            |                       |          |
| Overall social competence                | FASD only | 4.76 | .30            | F (2, 64.61) = 9.79   | < .001   |
|                                          | FASD+     | 3.37 | .43            |                       |          |
|                                          | NDDs      | 3.34 | .11            |                       |          |
| Responsibility and respect               | FASD only | 5.93 | .32            | F (2, 20.74) = 2.73   | .066     |
|                                          | FASD+     | 5.23 | .46            |                       |          |
|                                          | NDDs      | 5.12 | .12            |                       |          |
| Approaches to learning                   | FASD only | 4.79 | .29            | F (2, 55.22) = 9.04   | < .001   |
|                                          | FASD+     | 4.26 | .41            |                       |          |
|                                          | NDDs      | 3.53 | .11            |                       |          |
| Readiness to explore new things          | FASD only | 8.20 | .34            | F (2, 118.33) = 14.12 | < .001   |
|                                          | FASD+     | 7.23 | .48            |                       |          |
|                                          | NDDs      | 6.34 | .13            |                       |          |
| Prosocial and helping behaviour          | FASD only | 3.07 | .28            | F (2, 71.71) = 12.60  | < .001   |
|                                          | FASD+     | 2.83 | .40            |                       |          |
|                                          | NDDs      | 1.72 | .11            |                       |          |
| Anxious and fearful behaviour            | FASD only | 8.00 | .22            | F (2, 6.59) = 1.79    | .168     |
|                                          | FASD+     | 7.30 | .32            |                       |          |
|                                          | NDDs      | 7.66 | .09            |                       |          |
| Aggressive behaviour                     | FASD only | 7.52 | .25            | F (2, 1.39) = 0.29    | .747     |
|                                          | FASD+     | 7.76 | .36            |                       |          |
|                                          | NDDs      | 7.72 | .10            |                       |          |
| Hyperactivity and inattentive behaviour  | FASD only | 4.65 | .37            | F (2, 12.00) = 1.17   | .310     |
|                                          | FASD+     | 4.40 | .53            |                       |          |
|                                          | NDDs      | 4.07 | .14            |                       |          |
| Basic literacy                           | FASD only | 6.60 | .37            | F (2, 41.89) = 4.10   | .017     |
|                                          | FASD+     | 5.51 | .53            |                       |          |
|                                          | NDDs      | 5.46 | .14            |                       |          |
| Interest in literacy/numeracy and memory | FASD only | 6.80 | .39            | F (2, 31.60) = 2.84   | .059     |
|                                          | FASD+     | 5.74 | .55            |                       |          |
|                                          | NDDs      | 5.82 | .15            |                       |          |
| Advanced literacy                        | FASD only | 2.74 | .37            | F (2, 2.16) = 0.21    | .810     |
|                                          | FASD+     | 2.37 | .53            |                       |          |
|                                          | NDDs      | 2.51 | .14            |                       |          |
| Basic numeracy                           | FASD only | 6.70 | .42            | F (2, 75.60) = 5.74   | .003     |
|                                          | FASD+     | 5.45 | .60            |                       |          |
|                                          | NDDs      | 5.16 | .16            |                       |          |

|                                               |           |      |     |                      |        |
|-----------------------------------------------|-----------|------|-----|----------------------|--------|
| Communication skills and<br>general knowledge | FASD only | 4.34 | .32 | F (2, 80.71) = 10.59 | < .001 |
|                                               | FASD+     | 3.00 | .46 |                      |        |
|                                               | NDDs      | 2.75 | .12 |                      |        |

---

*Note.* MANCOVA controlled for age, sex, EFSL status, home problems, and neighbourhood SES.



Appendix 6. MANCOVA univariate results examining differences in scores on all 16 subdomains in Alberta among children with FASD-only, children with FASD and other comorbidities, and children with other NDDs

|                                            |           | Mean | Standard Error | F                     | <i>p</i> |
|--------------------------------------------|-----------|------|----------------|-----------------------|----------|
| Physical readiness for the school day      | FASD only | 8.31 | .31            | F (2, 3.29) = .471    | .625     |
|                                            | FASD+     | 7.82 | 1.33           |                       |          |
|                                            | NDDs      | 8.00 | .11            |                       |          |
| Physical independence                      | FASD only | 9.09 | .32            | F (2, 142.90) = 19.27 | < .001   |
|                                            | FASD+     | 8.90 | 1.37           |                       |          |
|                                            | NDDs      | 7.04 | .11            |                       |          |
| Gross and fine motor skills                | FASD only | 6.08 | .33            | F (2, 105.15) = 13.46 | < .001   |
|                                            | FASD+     | 6.03 | 1.40           |                       |          |
|                                            | NDDs      | 4.33 | .11            |                       |          |
| Overall social competence                  | FASD only | 4.73 | .30            | F (2, 61.28) = 9.20   | < .001   |
|                                            | FASD+     | 4.45 | 1.30           |                       |          |
|                                            | NDDs      | 3.38 | .10            |                       |          |
| Responsibility and respect                 | FASD only | 6.13 | .34            | F (2, 33.62) = 4.05   | .018     |
|                                            | FASD+     | 6.60 | 1.45           |                       |          |
|                                            | NDDs      | 5.17 | .12            |                       |          |
| Approaches to learning                     | FASD only | 5.30 | .30            | F (2, 57.90) = 8.73   | < .001   |
|                                            | FASD+     | 3.86 | 1.29           |                       |          |
|                                            | NDDs      | 3.97 | .10            |                       |          |
| Readiness to explore new things            | FASD only | 8.25 | .35            | F (2, 106.70) = 12.05 | < .001   |
|                                            | FASD+     | 5.63 | 1.49           |                       |          |
|                                            | NDDs      | 6.47 | .12            |                       |          |
| Prosocial and helping behaviour            | FASD only | 4.18 | .29            | F (2, 190.83) = 31.76 | < .001   |
|                                            | FASD+     | 4.44 | 1.23           |                       |          |
|                                            | NDDs      | 1.83 | .10            |                       |          |
| Anxious and fearful behaviour              | FASD only | 8.09 | .22            | F (2, 3.71) = 1.06    | .348     |
|                                            | FASD+     | 8.32 | .94            |                       |          |
|                                            | NDDs      | 7.77 | .08            |                       |          |
| Aggressive behaviour                       | FASD only | 7.64 | .22            | F (2, 11.61) = 3.30   | .038     |
|                                            | FASD+     | 9.42 | .94            |                       |          |
|                                            | NDDs      | 8.14 | .08            |                       |          |
| Hyperactivity and inattentive behaviour    | FASD only | 4.69 | .35            | F (2, 3.45) = 0.38    | .687     |
|                                            | FASD+     | 3.35 | 1.52           |                       |          |
|                                            | NDDs      | 4.67 | .12            |                       |          |
| Basic literacy                             | FASD only | 7.30 | .38            | F (2, 38.35) = 3.67   | .026     |
|                                            | FASD+     | 7.41 | 1.62           |                       |          |
|                                            | NDDs      | 6.25 | .13            |                       |          |
| Interest in literacy/numeracy and memory   | FASD only | 7.47 | .41            | F (2, 48.83) = 4.04   | .018     |
|                                            | FASD+     | 7.12 | 1.74           |                       |          |
|                                            | NDDs      | 6.26 | .14            |                       |          |
| Advanced literacy                          | FASD only | 3.21 | .38            | F (2, 3.99) = 0.37    | .692     |
|                                            | FASD+     | 4.40 | 1.65           |                       |          |
|                                            | NDDs      | 3.07 | .13            |                       |          |
| Basic numeracy                             | FASD only | 7.01 | .42            | F (2, 35.14) = 2.66   | .071     |
|                                            | FASD+     | 7.60 | 1.83           |                       |          |
|                                            | NDDs      | 6.04 | .15            |                       |          |
| Communication skills and general knowledge | FASD only | 5.27 | .35            | F (2, 135.21) = 15.10 | < .001   |
|                                            | FASD+     | 3.70 | 1.50           |                       |          |
|                                            | NDDs      | 3.24 | .12            |                       |          |

*Note.* MANCOVA controlled for age, sex, EFSL status, home problems, and neighbourhood SES.

Appendix 7. MANCOVA univariate results examining differences in scores on all 16 subdomains in British Columbia among children with FASD-only, children with FASD and other comorbidities, and children with other NDDs

|                                            |           | Mean | Standard Error | F                     | <i>p</i> |
|--------------------------------------------|-----------|------|----------------|-----------------------|----------|
| Physical readiness for the school day      | FASD only | 7.20 | .20            | F (2, 7.94) = 1.11    | .331     |
|                                            | FASD+     | 7.08 | .43            |                       |          |
|                                            | NDDs      | 7.47 | .08            |                       |          |
| Physical independence                      | FASD only | 8.28 | .21            | F (2, 208.30) = 26.36 | < .001   |
|                                            | FASD+     | 8.12 | .45            |                       |          |
|                                            | NDDs      | 6.74 | .08            |                       |          |
| Gross and fine motor skills                | FASD only | 5.23 | .21            | F (2, 157.59) = 20.71 | < .001   |
|                                            | FASD+     | 5.42 | .44            |                       |          |
|                                            | NDDs      | 3.95 | .08            |                       |          |
| Overall social competence                  | FASD only | 4.08 | .19            | F (2, 50.50) = 8.13   | < .001   |
|                                            | FASD+     | 3.76 | .40            |                       |          |
|                                            | NDDs      | 3.29 | .07            |                       |          |
| Responsibility and respect                 | FASD only | 5.44 | .21            | F (2, 15.57) = 1.91   | .148     |
|                                            | FASD+     | 4.76 | .46            |                       |          |
|                                            | NDDs      | 5.02 | .08            |                       |          |
| Approaches to learning                     | FASD only | 4.52 | .19            | F (2, 64.13) = 9.69   | < .001   |
|                                            | FASD+     | 4.39 | .41            |                       |          |
|                                            | NDDs      | 3.66 | .08            |                       |          |
| Readiness to explore new things            | FASD only | 7.62 | .21            | F (2, 121.30) = 14.95 | < .001   |
|                                            | FASD+     | 7.99 | .46            |                       |          |
|                                            | NDDs      | 6.54 | .08            |                       |          |
| Prosocial and helping behaviour            | FASD only | 3.37 | .17            | F (2, 209.50) = 38.35 | < .001   |
|                                            | FASD+     | 2.73 | .38            |                       |          |
|                                            | NDDs      | 1.77 | .07            |                       |          |
| Anxious and fearful behaviour              | FASD only | 7.58 | .15            | F (2, 0.45) = 0.11    | .893     |
|                                            | FASD+     | 7.49 | .32            |                       |          |
|                                            | NDDs      | 7.62 | .06            |                       |          |
| Aggressive behaviour                       | FASD only | 6.99 | .16            | F (2, 91.12) = 20.45  | < .001   |
|                                            | FASD+     | 6.51 | .34            |                       |          |
|                                            | NDDs      | 7.88 | .06            |                       |          |
| Hyperactivity and inattentive behaviour    | FASD only | 3.91 | .23            | F (2, 23.37) = 2.41   | .090     |
|                                            | FASD+     | 3.88 | .50            |                       |          |
|                                            | NDDs      | 4.41 | .09            |                       |          |
| Basic literacy                             | FASD only | 7.07 | .25            | F (2, 122.23) = 10.72 | < .001   |
|                                            | FASD+     | 7.31 | .54            |                       |          |
|                                            | NDDs      | 5.96 | .10            |                       |          |
| Interest in literacy/numeracy and memory   | FASD only | 7.17 | .25            | F (2, 78.69) = 6.87   | .001     |
|                                            | FASD+     | 7.73 | .54            |                       |          |
|                                            | NDDs      | 6.37 | .10            |                       |          |
| Advanced literacy                          | FASD only | 2.99 | .25            | F (2, 6.58) = 0.57    | .567     |
|                                            | FASD+     | 3.57 | .54            |                       |          |
|                                            | NDDs      | 2.98 | .10            |                       |          |
| Basic numeracy                             | FASD only | 6.90 | .28            | F (2, 166.51) = 11.85 | < .001   |
|                                            | FASD+     | 7.91 | .60            |                       |          |
|                                            | NDDs      | 5.79 | .11            |                       |          |
| Communication skills and general knowledge | FASD only | 4.56 | .21            | F (2, 280.90) = 35.85 | < .001   |
|                                            | FASD+     | 4.95 | .45            |                       |          |
|                                            | NDDs      | 2.88 | .08            |                       |          |

*Note.* MANCOVA controlled for age, sex, EFSL status, home problems, and neighbourhood SES.
